# Supplementary material
Source: PubMed Central journal article supplement (PMC3911201)
Supplement: AEM.02964-13_zam999105072so1.pdf [file AEM.02964-13_zam999105072so1.pdf]

1 Table S1. CFU/L before and after UV processing, % inactivation, and average log reduction of  
 2 bacterial pathogens in in PBS

| PATHOGEN                                               | 5-strain cocktail/L | Before UV CFU/L         | After UV CFU/L | % Inactivation | Log reduction (SD) |
|--------------------------------------------------------|---------------------|-------------------------|----------------|----------------|--------------------|
| <i>E. coli</i> O157:H7                                 | 1ml                 | 2.12 x 10 <sup>9</sup>  | 0              | 100            | 9.5 (0.27)         |
|                                                        | 10ml                | 1.24 x 10 <sup>10</sup> | 1              | 99.9           | 10.0 (0.26)        |
| <i>S. enterica</i>                                     | 1ml                 | 6.87 x 10 <sup>8</sup>  | 0              | 100            | 8.8 (0.16)         |
|                                                        | 10ml                | 5.47 x 10 <sup>9</sup>  | 3              | 99.9           | 9.4 (0.41)         |
| <i>L. monocytogenes</i>                                | 1ml                 | 1.53 x 10 <sup>9</sup>  | 3              | 99.9           | 8.8 (0.44)         |
|                                                        | 10ml                | 9.47 x 10 <sup>9</sup>  | 10             | 99.9           | 9.0 (0.25)         |
| <i>Ps. syringae</i><br>pv. <i>tomato</i>               | 1ml                 | 2.67 x 10 <sup>8</sup>  | 2              | 99.9           | 8.1 (0.21)         |
|                                                        | 10ml                | 6.00 x 10 <sup>9</sup>  | 24             | 99.9           | 8.5 (0.70)         |
| <i>C. michiganensis</i><br>subsp. <i>michiganensis</i> | 1ml                 | 6.43 x 10 <sup>8</sup>  | 20             | 99.9           | 7.5 (0.23)         |
|                                                        | 10ml                | 7.47 x 10 <sup>9</sup>  | 193            | 99.9           | 7.5 (0.28)         |

3 all values represent averages (n=6)

4

5

6

7

8

9

1 Table S2. Zoospores/L before and after UV processing, % inactivation, and log reduction of *Ph.*  
 2 *capsici* in RO water

| PATHOGEN           | Before UV<br>zoospores/L | After UV<br>zoospores/L | % Inactivation | Log reduction<br>(SD) |
|--------------------|--------------------------|-------------------------|----------------|-----------------------|
| <i>Ph. capsici</i> | 5 x 10 <sup>4</sup>      | 0                       | 100            | 4.7 (0.0)             |
|                    | 5 x 10 <sup>5</sup>      | 5                       | 99.9           | 5.0 (0.18)            |

3 all values represent averages (n=6)

4

5

6

7

8

9

10

11

12

13

14

15

1 Table S3. CFU/L before and after UV processing, % inactivation, and average log reduction of  
 2 bacterial pathogens in creek water

| PATHOGEN                                               | 5 -strain cocktail/L | Before UV CFU/L         | After UV CFU/L | % Inactivation | Log reduction (SD) |
|--------------------------------------------------------|----------------------|-------------------------|----------------|----------------|--------------------|
| <i>E. coli</i> O157:H7                                 | 1ml                  | 1.73 x 10 <sup>9</sup>  | 0              | 100            | 9.5 (0.36)         |
|                                                        | 10ml                 | 6.47 x 10 <sup>9</sup>  | 2              | 99.9           | 9.5 (0.72)         |
| <i>S. enterica</i>                                     | 1ml                  | 4.67 x 10 <sup>8</sup>  | 0              | 100            | 8.6 (0.23)         |
|                                                        | 10ml                 | 8.00 x 10 <sup>9</sup>  | 44             | 99.9           | 8.6 (0.67)         |
| <i>L. monocytogenes</i>                                | 1ml                  | 1.97 x 10 <sup>9</sup>  | 19             | 99.9           | 7.9 (0.42)         |
|                                                        | 10ml                 | 1.17 x 10 <sup>10</sup> | 809            | 99.9           | 7.1 (0.25)         |
| <i>Ps. syringae</i><br>pv. <i>tomato</i>               | 1ml                  | 1.15 x 10 <sup>9</sup>  | 26             | 99.9           | 7.7 (0.34)         |
|                                                        | 10ml                 | 1.03 x 10 <sup>10</sup> | 198            | 99.9           | 7.7 (0.22)         |
| <i>C. michiganensis</i><br>subsp. <i>michiganensis</i> | 1ml                  | 4.65 x 10 <sup>8</sup>  | 62             | 99.9           | 6.9 (0.19)         |
|                                                        | 10ml                 | 5.51 x 10 <sup>9</sup>  | 1,817          | 99.9           | 6.5 (0.16)         |

3 all values represent averages (n=6)

4

5

6

7

8

9

1 Table S4. Zoospores/L before and after UV processing, % inactivation, and log reduction of *Ph.*  
 2 *capsici* in creek water

| PATHOGEN           | Before UV<br>zoospores/L | After UV<br>zoospores/L | % Inactivation | Log reduction<br>(SD) |
|--------------------|--------------------------|-------------------------|----------------|-----------------------|
| <i>Ph. capsici</i> | 5 x 10 <sup>4</sup>      | 0                       | 100            | 4.7 (0.0)             |
|                    | 5 x 10 <sup>5</sup>      | 8                       | 99.9           | 4.8 (0.21)            |

3 all values represent averages (n=6)

4

5

6

7

8

9

10

11

12

13

14

15

1 Table S5. CFU/L before and after UV processing, % inactivation, and average log reduction of  
 2 bacterial pathogens in pond water

| PATHOGEN                                               | 5-strain cocktail/L | Before UV CFU/L         | After UV CFU/L | % Inactivation | Log reduction (SD) |
|--------------------------------------------------------|---------------------|-------------------------|----------------|----------------|--------------------|
| <i>E. coli</i> O157:H7                                 | 1ml                 | 2.67 x 10 <sup>9</sup>  | 0              | 100            | 9.5 (0.12)         |
|                                                        | 10ml                | 8.00 x 10 <sup>9</sup>  | 460            | 99.9           | 7.3 (0.33)         |
| <i>S. enterica</i>                                     | 1ml                 | 6.47 x 10 <sup>8</sup>  | 4              | 99.9           | 8.3 (0.35)         |
|                                                        | 10ml                | 7.00 x 10 <sup>9</sup>  | 108            | 99.9           | 7.9 (0.21)         |
| <i>L. monocytogenes</i>                                | 1ml                 | 2.10 x 10 <sup>9</sup>  | 123            | 99.9           | 7.2 (0.13)         |
|                                                        | 10ml                | 1.13 x 10 <sup>10</sup> | 4,576          | 99.9           | 6.3 (0.21)         |
| <i>Ps. syringae</i><br>pv. <i>tomato</i>               | 1ml                 | 1.68 x 10 <sup>9</sup>  | 138            | 99.9           | 6.9 (0.42)         |
|                                                        | 10ml                | 1.11 x 10 <sup>10</sup> | 1,986          | 99.9           | 6.8 (0.22)         |
| <i>C. michiganensis</i><br>subsp. <i>michiganensis</i> | 1ml                 | 1.92 x 10 <sup>9</sup>  | 311            | 99.9           | 6.8 (0.18)         |
|                                                        | 10ml                | 1.84 x 10 <sup>10</sup> | 16,033         | 99.9           | 6.1 (0.16)         |

3 all values represent averages (n=6)

4  
 5  
 6  
 7  
 8  
 9  
 10

1 Table S6. Zoospores/L before and after UV processing, % inactivation, and log reduction of *Ph.*  
 2 *capsici* in pond water

| PATHOGEN           | Before UV<br>zoospores/L | After UV<br>zoospores/L | % Inactivation | Log reduction<br>(SD) |
|--------------------|--------------------------|-------------------------|----------------|-----------------------|
| <i>Ph. capsici</i> | 5 x 10 <sup>4</sup>      | 1                       | 99.9           | 4.7 (0.0)             |
|                    | 5 x 10 <sup>5</sup>      | 32                      | 99.9           | 4.2 (0.15)            |

3 all values represent averages (n=6)

4

5

6

7

8

9

10

11

12

13

14

15
